# Supplementary material for: Prenatal GABAB Receptor Agonist Administration Corrects the Inheritance of Autism-Like Core Behaviors in Offspring of Mice Prenatally Exposed to Valproic Acid
Source: PubMed Central journal article supplement (PMC9051083; doi:10.3389/fpsyt.2022.835993), 2022-04-15
Supplement: Data_Sheet_1.pdf [file Data_Sheet_1.pdf]

Supplementary Figure 1: Flowchart for eliminating the “litter effect”

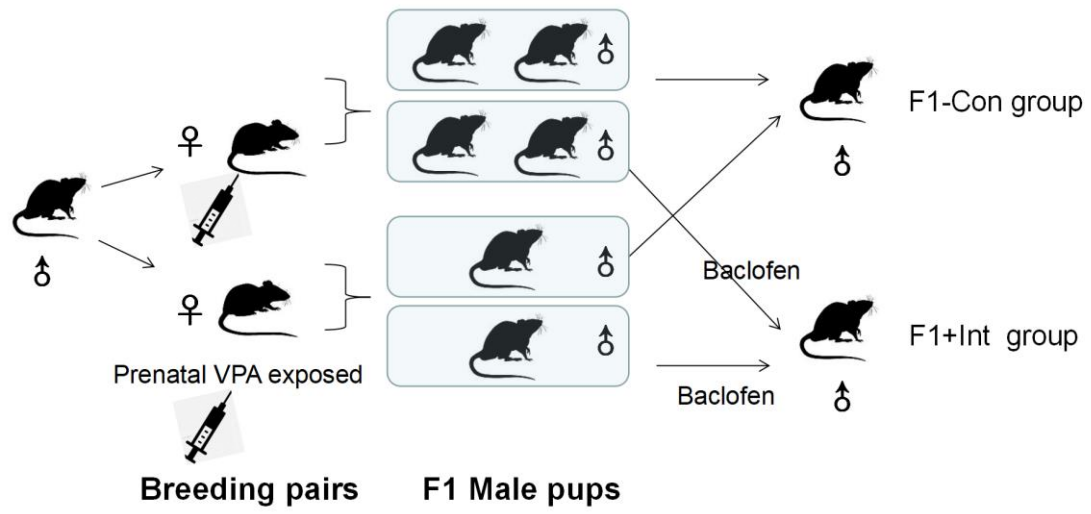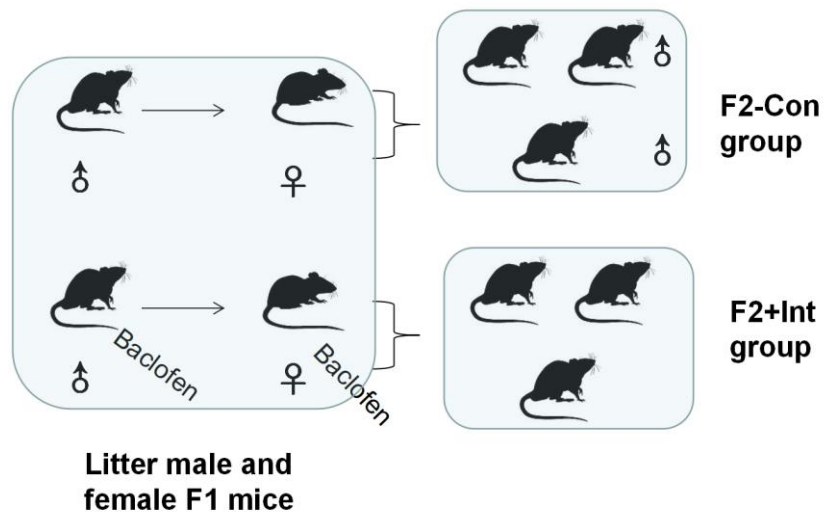

Supplementary Figure 2: Flowchart for behavioral test

① Flowchart of social interaction test

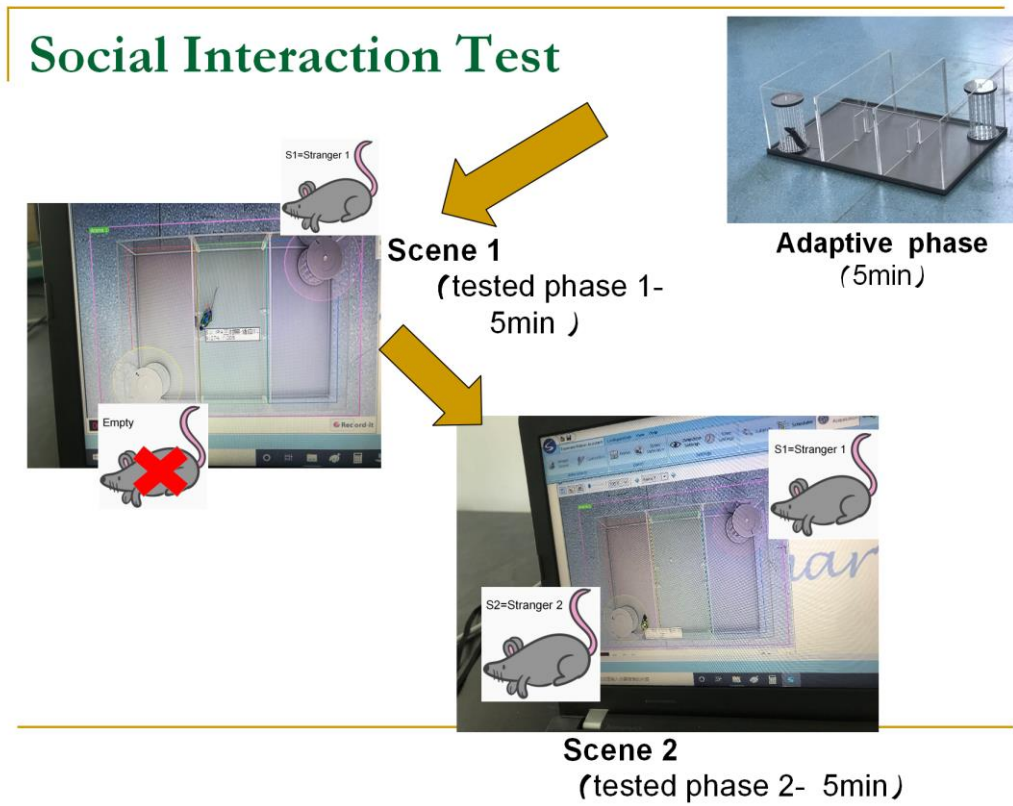

② Flowchart of novel object recognition task

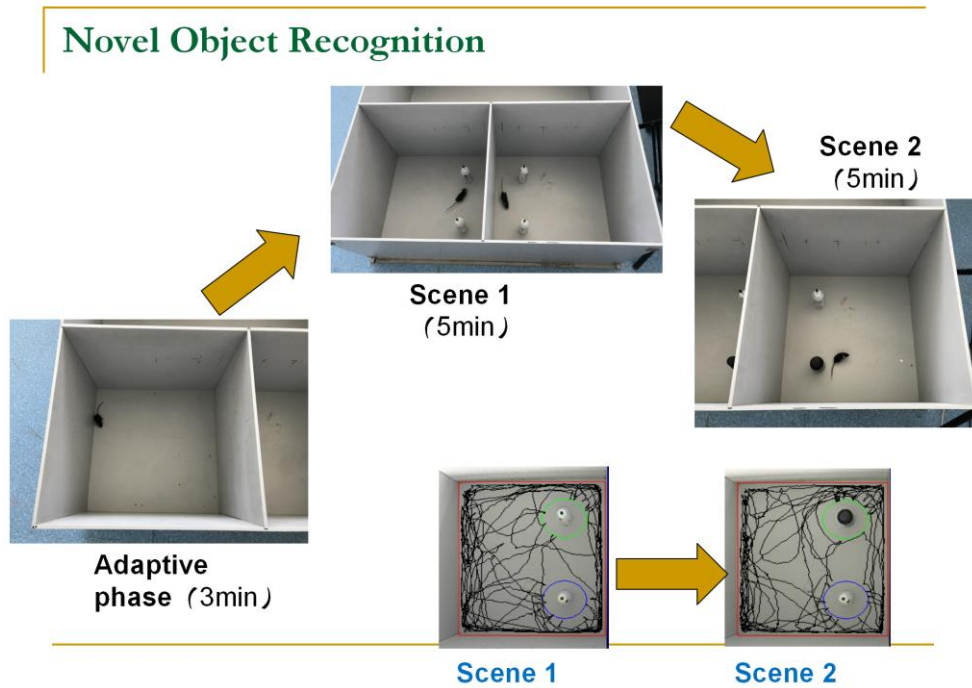

③ Flowchart of open-field task and open-field habituation task

### Open-Field Task and Open-Field Habituation Task

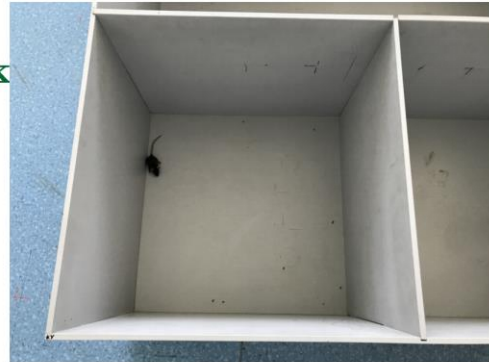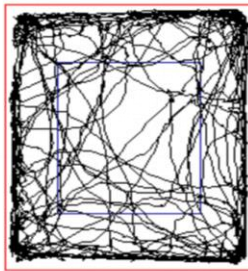

24h later  
→

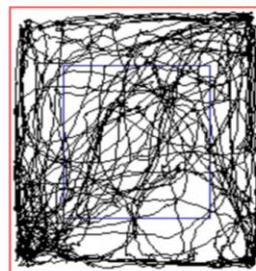

Behavior of control mice (WT)

**Open-Field Task**  
(10min)

**Open-Field Habituation Task**  
(10min)

④ Flowchart of marble burying test

### Marble Burying Test

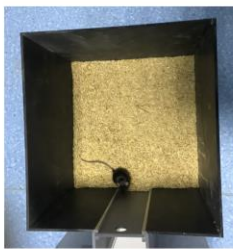

Adaptive phase -3min

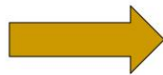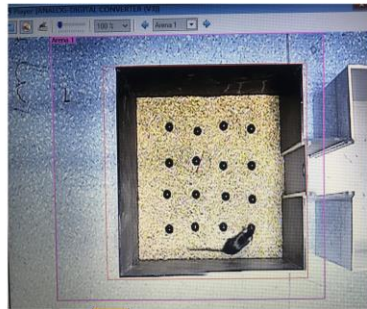

Tested phase-10min

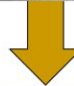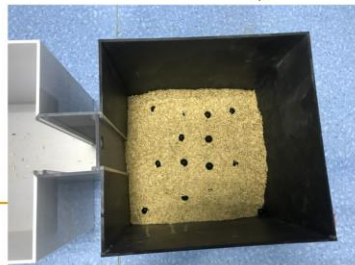

Collected image
